# Supplementary material for: A fluorescent sensor based on a silicon quantum dots/chitosan nanocomposite for tetracycline monitoring in serum samples
Source: Royal Society of Chemistry journal article supplement (doi:10.1039/d5ay01668a), 2025-01-01
Supplement: d5ay01668a1.pdf [file d5ay01668a1.pdf]

## **Electronic Supplementary Material**

### **A fluorescent sensor based on silicon quantum dots/chitosan nanocomposite for tetracycline monitoring in serum samples**

Hossein Abdolmohammad-Zadeh\*, Samira Nasirian

*Analytical Spectroscopy Research Lab., Department of Chemistry, Faculty of Sciences,  
Azarbaijan Shahid Madani University, 35 Km Tabriz-Marageh Road, P.O. Box 53714-161,  
Tabriz 5375171379, Iran*

\* Corresponding author, Tel.: +98 4131457500, Fax: +98 4131457541

E-mail addresses: h.abdol@azaruniv.ac.ir, h\_abdol@yahoo.com

ORCID: [orcid.org/0000-0003-3383-6173](https://orcid.org/0000-0003-3383-6173)

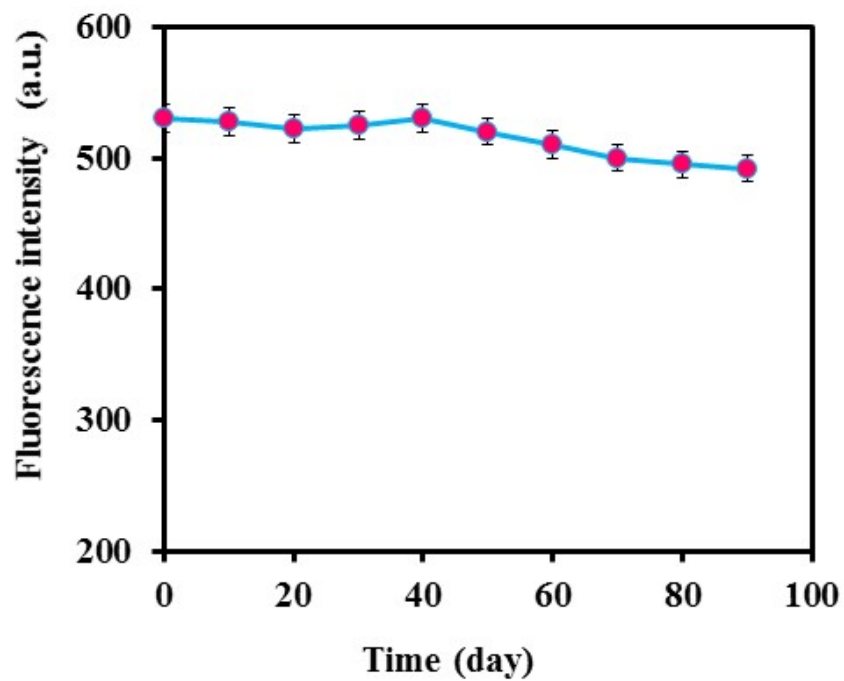

**Fig. S1.** Study of long-term stability of the presented fluorescent sensor

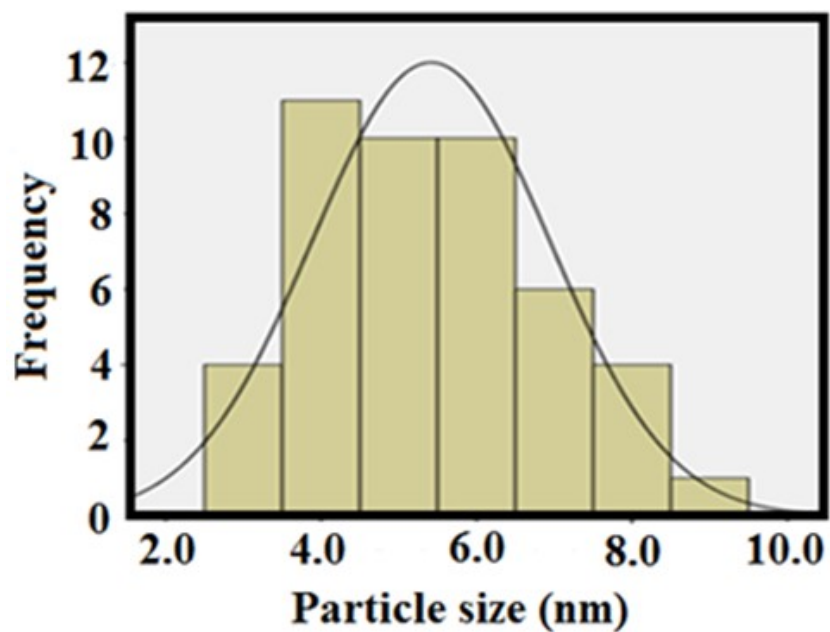

**Fig. S2.** Particle size distribution of SiQDs/CS obtained from DLS analysis

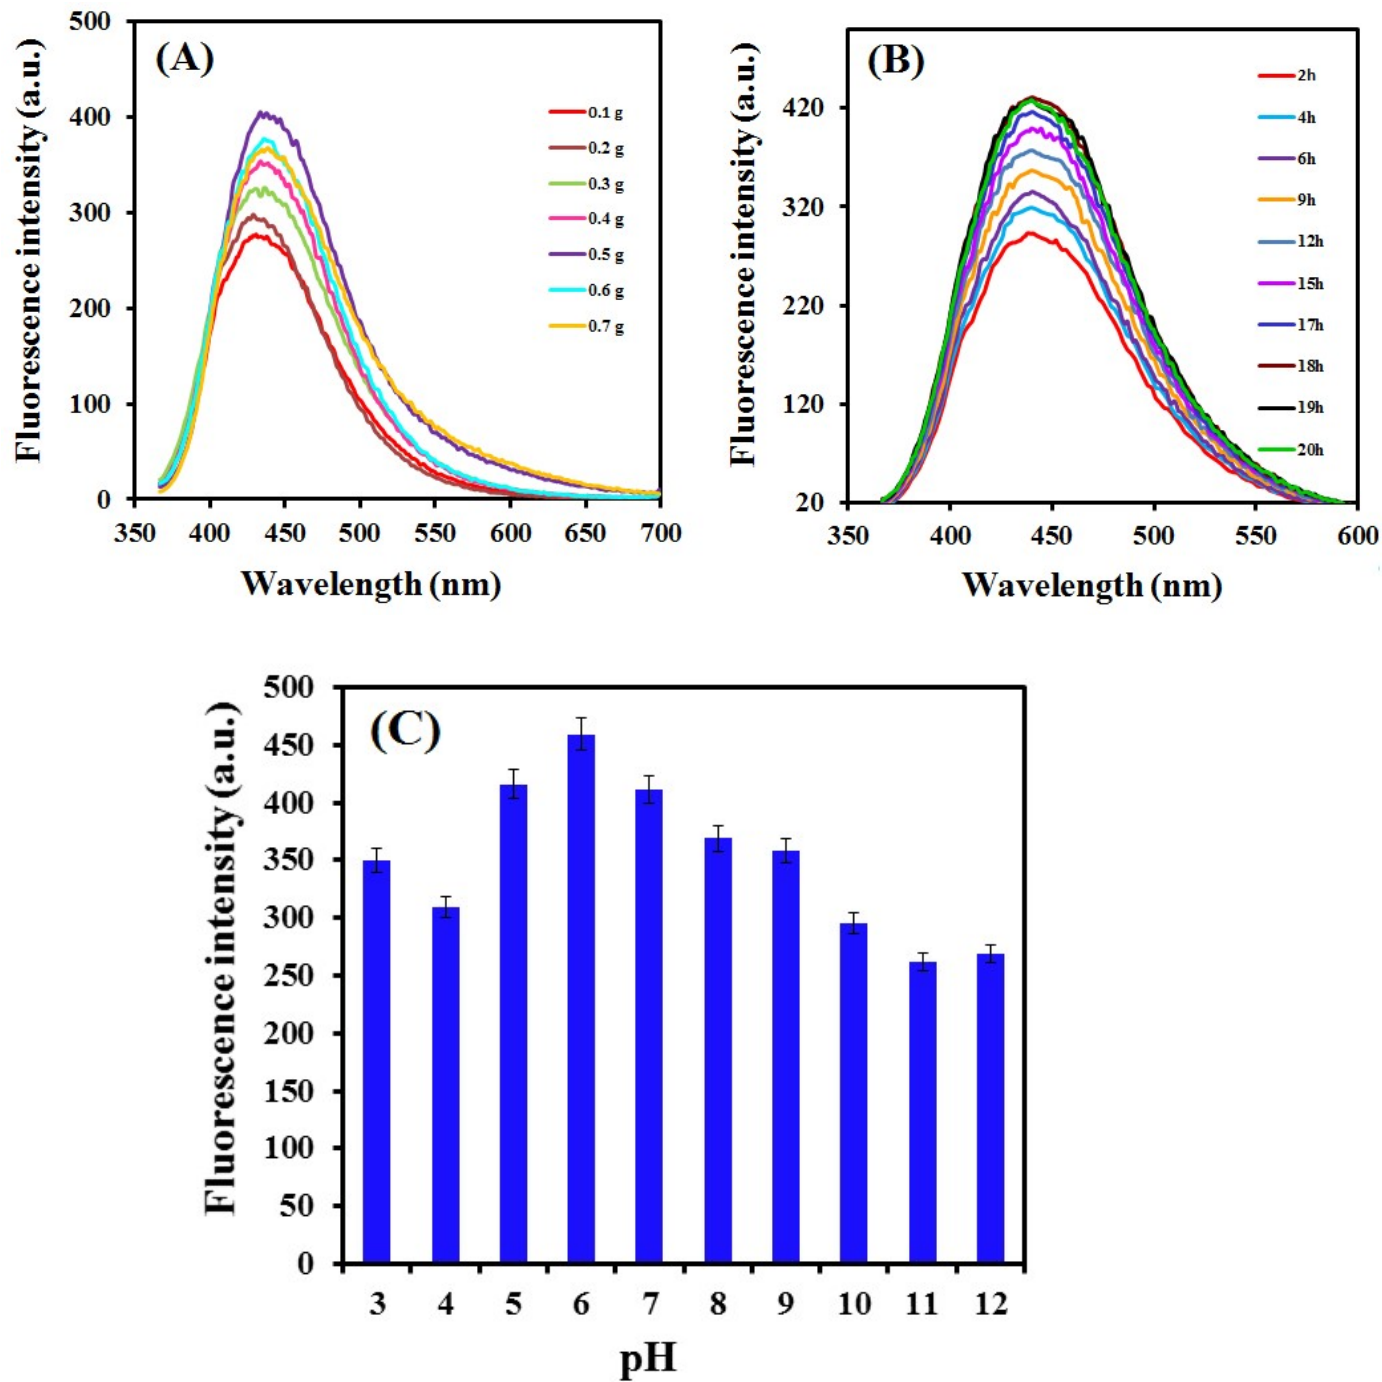

**Fig. S3.** Effect of (A) dosage of chitosan, (B) interaction time, and (C) pH on the synthesis of SiQDs/CS

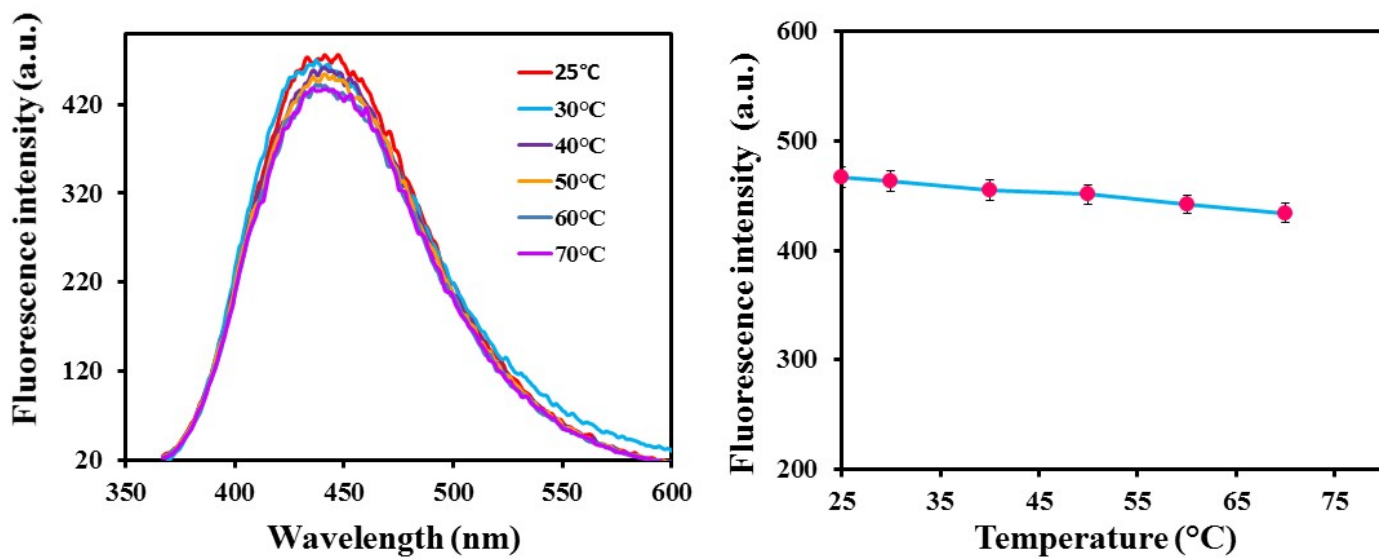

Fig. S4. Effect of temperature on the synthesis of SiQDs/CS

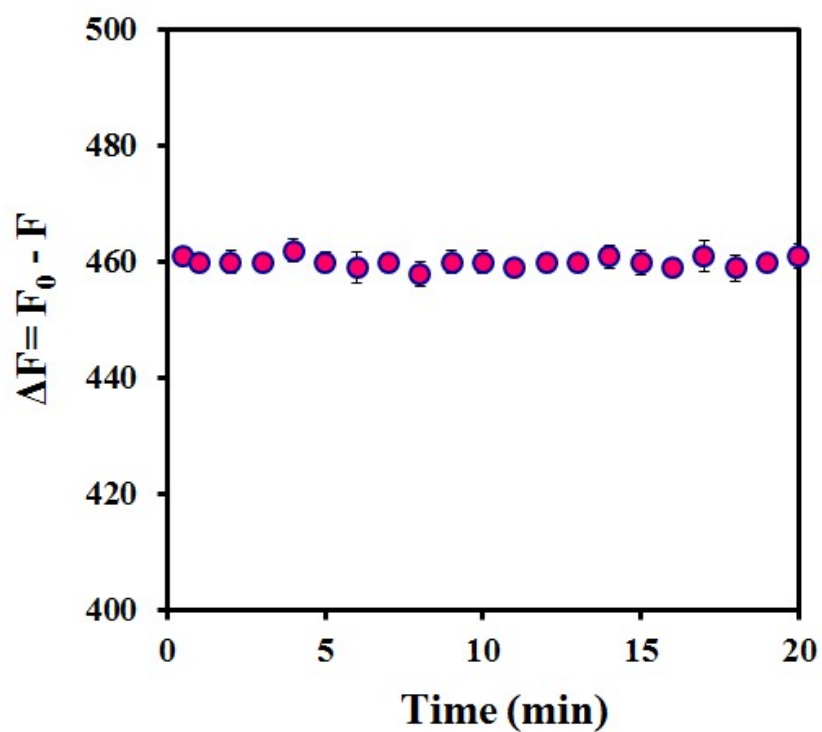

Fig. S5. Effect of incubation time on the analytical signal

**Table S1.** The calculated values regarding the effect of IFE in fluorescence quenching of SiQDs/CS by TC

| TC concentration<br>( $\mu\text{g L}^{-1}$ ) | $A_{\text{ex}}$ | $A_{\text{em}}$ | $F_{\text{obsd}}$ | $F_{\text{cor}}$ | $E_{\text{obsd}}$ | $E_{\text{cor}}$ |
|----------------------------------------------|-----------------|-----------------|-------------------|------------------|-------------------|------------------|
| 0.0                                          | 0.035           | 0.00554         | 530.023           | 555.347          | 0.000             | 0.000            |
| 0.7                                          | 0.044           | 0.006243        | 522.157           | 553.251          | 0.014             | 0.0037           |
| 1.0                                          | 0.057           | 0.007120        | 517.046           | 556.658          | 0.024             | 0.0023           |
| 2.0                                          | 0.070           | 0.008586        | 508.112           | 556.227          | 0.041             | 0.0015           |
| 3.0                                          | 0.0835          | 0.009627        | 500.709           | 557.376          | 0.055             | 0.0036           |
| 5.0                                          | 0.101           | 0.012354        | 485.226           | 552.867          | 0.084             | 0.0044           |
| 10.0                                         | 0.172           | 0.015589        | 444.515           | 551.671          | 0.161             | 0.0066           |

$E_{\text{obs}} = 1 - (F_{\text{obsd}}/F_{\text{obsd},0})$ .  $F_{\text{obsd},0}$  and  $F_{\text{obsd}}$  are the observed fluorescence intensities of SiQDs/CS in the absence and presence of TC, respectively.

$E_{\text{cor}} = 1 - (F_{\text{cor}}/F_{\text{cor},0})$ .  $F_{\text{cor},0}$  and  $F_{\text{cor}}$  are the corrected fluorescence intensities of SiQDs/CS in the absence and presence of TCc, respectively.

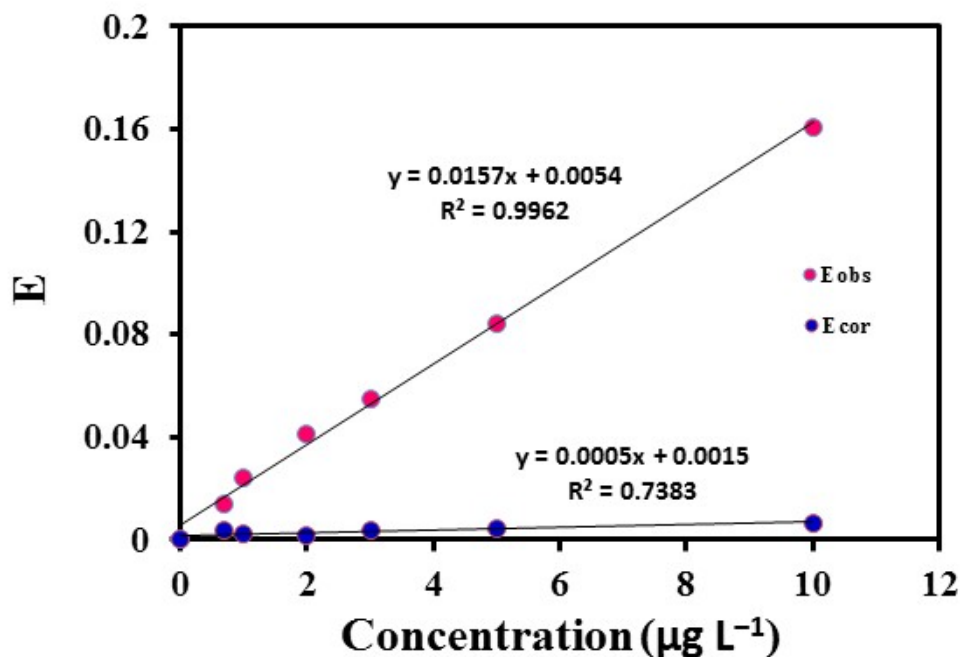

**Fig. S6.** The observed and corrected fluorescence quenching efficiencies ( $E_{\text{obs}}$  and  $E_{\text{cor}}$ ) versus TC concentration
